# Supplementary material for: Iroquois Complex Genes Induce Co-Expression of rhodopsins in Drosophila
Source: PubMed Central journal article supplement (PMC2323304; doi:10.1371/journal.pbio.0060097), 2008-04-22
Supplement: pbio.0060097.sg001.pdf [file pbio.0060097.sg001.pdf]

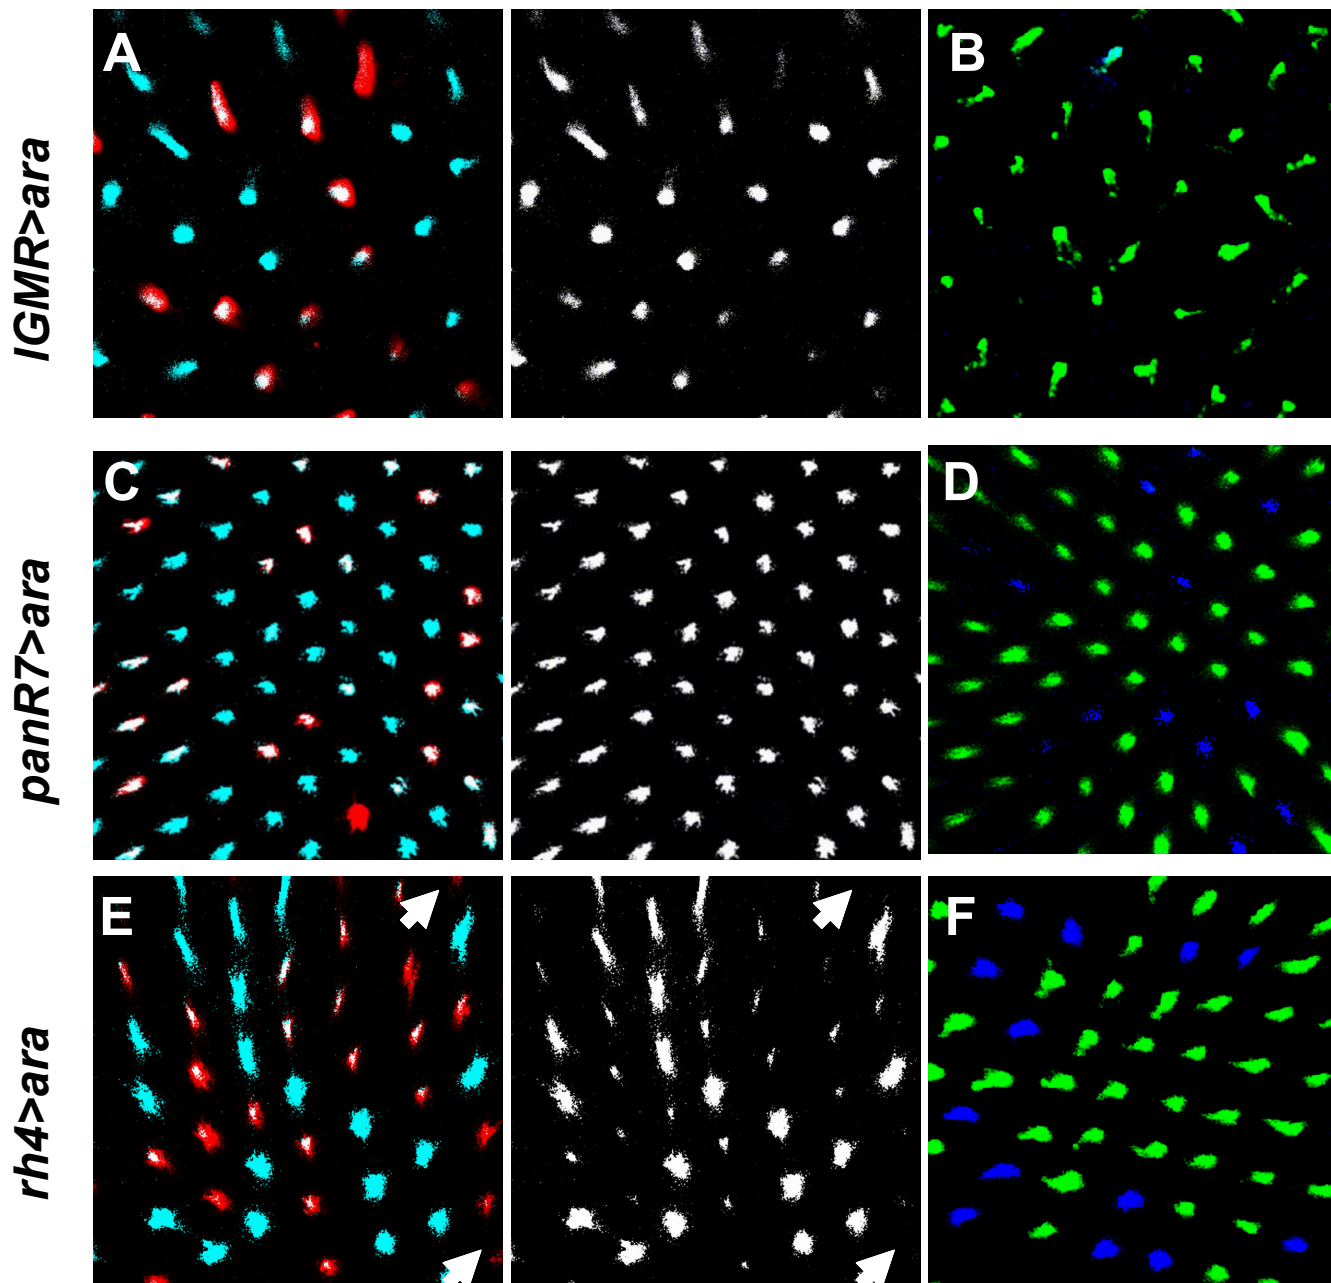

Rh3 Rh4

Rh3

Rh5 Rh6

*rh5+rh6>caup*

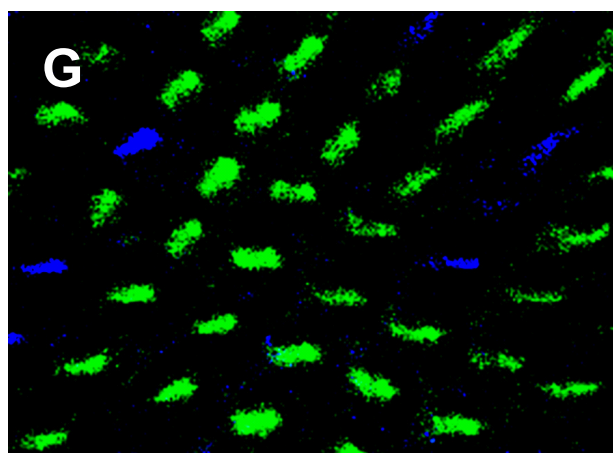

Rh5 Rh6
